# Supplementary material for: Hedgehog signaling patterns the oral-aboral axis of the mandibular arch
Source: eLife. 2019 Jan 14;8:e40315. doi: 10.7554/eLife.40315 (PMC6347453; doi:10.7554/eLife.40315)
Supplement: Supplementary file 1. — Column A lists gene name. Column B lists p value of differential expression. Column C lists average fold change over all other clusters. Column D list the percentage of cells in the corresponding cluster expressing the marker gene. Column E list the percentage of cells in all other clusters combined expressing the marker gene. Column F list the Bonferroni corrected p value. Column G lists the cluster name. NC1 – NC2, neural crest derived mesenchyme cells; Epi, epithelial cells; Endo, endothelial cells; HM, head mesoderm cells. [file elife-40315-supp1.xlsx]

## Sheet: Mandible_lessgroups_extended_ge
gene name	p_val	avg_logFC	pct.1	pct.2	p_val_adj	cluster
Barx1	0	0.924285	0.745	0.31	0	NC1
Gas1	0	0.78421	0.791	0.468	0	NC1
Nr2f1	0	0.635144	0.826	0.437	0	NC1
Plagl1	0	1.06302	0.7	0.153	0	NC2
Hand1	0	0.960711	0.371	0.031	0	NC2
Dlk1	0	0.84547	0.944	0.631	0	NC2
Id2	0	0.786399	0.939	0.676	0	NC2
Peg3	0	0.77268	0.963	0.754	0	NC2
Meg3	0	0.748263	0.975	0.743	0	NC2
H19	0	0.73588	0.998	0.892	0	NC2
Hand2	0	0.734167	0.782	0.283	0	NC2
Igf2	0	0.639173	0.888	0.476	0	NC2
Runx1t1	0	0.612638	0.714	0.364	0	NC2
Bambi	3.94844e-301	0.615638	0.671	0.343	6.74157e-297	NC2
Cited1	1.03638e-278	0.609676	0.681	0.368	1.76952e-274	NC2
Mpped2	3.02752e-275	0.665418	0.676	0.37	5.16919e-271	NC2
Msx1	3.84206e-132	0.661759	0.634	0.459	6.55994e-128	NC2
Pdgfa	0	1.93838	0.947	0.049	0	Epi
Mt1	0	1.86799	0.884	0.153	0	Epi
Mt2	0	1.85817	0.806	0.076	0	Epi
Igfbp5	0	1.84832	0.906	0.084	0	Epi
Cxcl14	0	1.61015	0.482	0.045	0	Epi
Wnt6	0	1.34665	0.749	0.011	0	Epi
Igfbp2	0	1.31408	0.913	0.373	0	Epi
Sostdc1	0	1.27329	0.599	0.057	0	Epi
4631405K08Rik	0	1.1525	0.766	0.008	0	Epi
Tfap2b	0	1.09069	0.426	0.009	0	Epi
Perp	0	1.07673	0.761	0.01	0	Epi
Ifitm3	0	1.04532	0.726	0.105	0	Epi
Fgf8	0	1.00107	0.316	0.01	0	Epi
Spint2	0	0.986253	0.784	0.077	0	Epi
Epcam	0	0.980622	0.715	0.024	0	Epi
Krt18	0	0.977182	0.641	0.031	0	Epi
Slc2a3	0	0.932075	0.511	0.042	0	Epi
Krt14	0	0.929898	0.554	0.01	0	Epi
S100a10	0	0.918599	0.713	0.105	0	Epi
Col18a1	0	0.914218	0.76	0.147	0	Epi
Fermt1	0	0.894686	0.655	0.004	0	Epi
Pitx2	0	0.876991	0.487	0.022	0	Epi
Wnt4	0	0.845883	0.589	0.01	0	Epi
Gm16136	0	0.844546	0.597	0.009	0	Epi
Tpd52	0	0.827198	0.686	0.051	0	Epi
Trp63	0	0.800307	0.638	0.007	0	Epi
Ikzf2	0	0.756761	0.603	0.073	0	Epi
Bcam	0	0.724661	0.62	0.027	0	Epi
Nav2	0	0.69631	0.574	0.028	0	Epi
Npnt	0	0.690936	0.559	0.053	0	Epi
Pdlim1	0	0.682904	0.525	0.031	0	Epi
Ntf5	0	0.673388	0.548	0.009	0	Epi
Sfn	0	0.667649	0.458	0.006	0	Epi
Dapl1	0	0.666853	0.345	0.023	0	Epi
Cdkn1a	0	0.646804	0.413	0.017	0	Epi
Sema3c	0	0.646502	0.496	0.05	0	Epi
Cldn6	0	0.630805	0.489	0.006	0	Epi
Fras1	0	0.612417	0.57	0.079	0	Epi
Bex1	1.4058e-296	0.982259	0.953	0.633	2.40026e-292	Epi
Dag1	3.4667e-293	0.760845	0.679	0.19	5.91905e-289	Epi
Ptprf	2.60129e-257	0.868481	0.819	0.39	4.44144e-253	Epi
Cd24a	2.02838e-249	0.713499	0.999	0.982	3.46326e-245	Epi
Arl4c	4.28995e-247	0.627928	0.621	0.166	7.32467e-243	Epi
S100a11	2.33333e-218	1.27215	0.893	0.538	3.98394e-214	Epi
Hras	6.48958e-217	0.776381	0.93	0.699	1.10803e-212	Epi
Ccnd2	6.87895e-204	0.917329	0.958	0.803	1.17451e-199	Epi
Tpm1	9.07571e-160	0.708775	0.882	0.655	1.54959e-155	Epi
Meis2	2.98599e-148	0.661644	0.917	0.664	5.09829e-144	Epi
Prdx1	1.68067e-180	0.844392	0.994	0.967	2.86958e-176	NC3
Ubb	4.34104e-88	0.664502	0.924	0.93	7.41188e-84	NC3
Eno1	4.13678e-75	0.61091	0.909	0.911	7.06314e-71	NC3
Prmt1	2.439e-54	0.603122	0.787	0.803	4.16434e-50	NC3
S100a16	0	1.89221	0.813	0.025	0	Endo
Crip2	0	1.86173	0.827	0.073	0	Endo
Cd34	0	1.62828	0.785	0.013	0	Endo
Vamp5	0	1.60173	0.81	0.02	0	Endo
Emcn	0	1.49744	0.729	0.004	0	Endo
Kdr	0	1.45109	0.715	0.006	0	Endo
Cldn5	0	1.43388	0.687	0.003	0	Endo
Prkcdbp	0	1.372	0.725	0.041	0	Endo
Cdh5	0	1.33274	0.69	0.004	0	Endo
Lmo2	0	1.33012	0.792	0.026	0	Endo
Kcne3	0	1.2844	0.479	0.008	0	Endo
Ecscr	0	1.21885	0.68	0.014	0	Endo
Rasgrp2	0	1.20499	0.665	0.016	0	Endo
Plvap	0	1.19957	0.658	0.036	0	Endo
Efna1	0	1.12451	0.627	0.042	0	Endo
Flt1	0	1.11706	0.613	0.005	0	Endo
Mef2c	0	1.0692	0.764	0.088	0	Endo
Aplnr	0	1.04844	0.479	0.003	0	Endo
Plxnd1	0	1.03681	0.687	0.026	0	Endo
Tgfb1	0	1.02875	0.651	0.023	0	Endo
Cd93	0	1.01937	0.602	0.002	0	Endo
Tmem255a	0	1.00988	0.616	0.004	0	Endo
Klf2	0	0.992185	0.43	0.009	0	Endo
Smagp	0	0.981147	0.644	0.009	0	Endo
Mfng	0	0.968786	0.63	0.003	0	Endo
Pecam1	0	0.940877	0.616	0.015	0	Endo
Col15a1	0	0.934062	0.567	0.005	0	Endo
Eng	0	0.877592	0.588	0.014	0	Endo
S100a13	0	0.857406	0.662	0.039	0	Endo
Esam	0	0.82248	0.532	0.003	0	Endo
Clec1b	0	0.795089	0.486	0.001	0	Endo
Tm6sf1	0	0.780083	0.602	0.019	0	Endo
Gimap6	0	0.775525	0.539	0.006	0	Endo
8430408G22Rik	0	0.769736	0.335	0.003	0	Endo
Icam2	0	0.765965	0.549	0.001	0	Endo
Anxa3	0	0.755189	0.585	0.02	0	Endo
Gngt2	0	0.7159	0.535	0.012	0	Endo
Lcp1	0	0.703177	0.521	0.006	0	Endo
Hhex	0	0.67557	0.489	0.003	0	Endo
Flt4	0	0.642982	0.461	0.002	0	Endo
Adgrf5	0	0.641984	0.447	0.002	0	Endo
Dusp3	0	0.640029	0.493	0.025	0	Endo
Rasgrp3	0	0.633679	0.437	0.002	0	Endo
Tspan18	0	0.612266	0.454	0.008	0	Endo
Ctla2a	0	0.606884	0.43	0.004	0	Endo
Ptpn18	4.93598e-307	0.724176	0.528	0.039	8.42769e-303	Endo
Tagln2	3.51355e-294	1.31638	0.866	0.143	5.99903e-290	Endo
Arpc1b	2.50732e-286	1.53536	0.859	0.149	4.281e-282	Endo
Vim	5.80359e-274	1.64376	0.88	0.164	9.90905e-270	Endo
Gng11	1.8324e-262	2.00115	0.898	0.195	3.12864e-258	Endo
Anxa2	4.29063e-260	0.754522	0.549	0.05	7.32583e-256	Endo
Timp3	7.00564e-258	1.09181	0.581	0.061	1.19614e-253	Endo
Ets1	3.11206e-254	0.777405	0.553	0.055	5.31353e-250	Endo
Egfl7	5.40244e-253	2.17043	0.937	0.235	9.22413e-249	Endo
Pon2	1.51467e-241	0.65916	0.574	0.061	2.58615e-237	Endo
Igfbp3	1.70796e-226	1.19199	0.542	0.059	2.91616e-222	Endo
Nrarp	4.66455e-221	0.680289	0.426	0.035	7.96425e-217	Endo
Emp1	3.08784e-218	0.798347	0.507	0.053	5.27219e-214	Endo
Cmtm8	4.17185e-218	0.758787	0.553	0.064	7.12302e-214	Endo
Rhoj	8.75404e-215	0.810961	0.627	0.088	1.49467e-210	Endo
Sparc	3.71112e-197	1.33271	0.757	0.157	6.33637e-193	Endo
Itga6	1.2752e-196	0.634464	0.546	0.068	2.17727e-192	Endo
Ostf1	5.57142e-194	0.725287	0.641	0.101	9.51264e-190	Endo
Ptp4a3	4.20735e-190	1.72126	0.813	0.201	7.18363e-186	Endo
Ramp2	3.12756e-184	1.22744	0.732	0.161	5.33999e-180	Endo
Tmsb4x	1.40641e-177	2.60531	1	0.97	2.4013e-173	Endo
Pcdh17	2.56e-177	0.71015	0.482	0.059	4.37094e-173	Endo
Crip1	9.14728e-175	0.977598	0.673	0.127	1.56181e-170	Endo
S100a10	2.17115e-173	0.79599	0.718	0.137	3.70702e-169	Endo
Arhgap31	6.86889e-162	0.759769	0.595	0.104	1.17279e-157	Endo
Plk2	1.34207e-158	0.684072	0.486	0.067	2.29144e-154	Endo
Slc9a3r2	4.73822e-156	0.830566	0.588	0.105	8.09004e-152	Endo
Dok4	2.72475e-155	0.802842	0.511	0.079	4.65224e-151	Endo
Hspg2	1.10439e-152	0.93234	0.592	0.113	1.88564e-148	Endo
Nrp1	1.44756e-140	0.884468	0.644	0.138	2.47156e-136	Endo
Col4a1	2.54089e-138	0.996514	0.655	0.162	4.33831e-134	Endo
Ralb	2.17002e-137	0.920823	0.827	0.285	3.70509e-133	Endo
Tubb6	3.45339e-136	0.649549	0.546	0.097	5.89632e-132	Endo
Sh3bgrl3	2.27066e-133	1.06192	0.989	0.856	3.87693e-129	Endo
Cotl1	2.86456e-132	1.19063	0.93	0.526	4.89095e-128	Endo
Ipo11	1.16389e-128	0.836268	0.697	0.192	1.98723e-124	Endo
Msn	1.49879e-126	0.815961	0.722	0.214	2.55904e-122	Endo
Rhob	8.66298e-126	0.704904	0.637	0.148	1.47912e-121	Endo
Myl6	4.85315e-125	1.14648	0.979	0.752	8.28626e-121	Endo
Fkbp1a	2.39407e-118	0.889566	1	0.974	4.08764e-114	Endo
Col4a2	1.91989e-117	1.01602	0.694	0.217	3.27802e-113	Endo
Cyba	2.32974e-117	0.702747	0.553	0.117	3.97779e-113	Endo
Clic1	1.41726e-115	1.09743	0.933	0.534	2.41983e-111	Endo
Gnai2	1.04595e-114	1.09134	0.968	0.772	1.78585e-110	Endo
Pea15a	9.17251e-107	0.818125	0.655	0.195	1.56611e-102	Endo
Col18a1	9.92331e-105	0.817874	0.651	0.182	1.69431e-100	Endo
Sipa1	1.5587e-102	0.631088	0.556	0.131	2.66133e-98	Endo
Cd81	6.98339e-98	1.04473	0.915	0.574	1.19234e-93	Endo
Itm2b	1.92325e-96	0.865026	0.81	0.341	3.28376e-92	Endo
Elk3	9.21515e-96	0.799172	0.673	0.232	1.57339e-91	Endo
Abhd17a	3.30376e-91	1.06487	0.901	0.592	5.64083e-87	Endo
Csrp1	1.36132e-90	0.653694	0.634	0.19	2.32432e-86	Endo
Klf7	4.26227e-88	0.658511	0.588	0.175	7.27741e-84	Endo
Gpx3	1.97236e-80	0.782077	0.725	0.293	3.36761e-76	Endo
Vasp	4.32597e-77	0.706722	0.746	0.326	7.38616e-73	Endo
Sptbn1	1.13068e-76	0.795428	0.729	0.34	1.93052e-72	Endo
Ppic	1.06212e-74	0.764644	0.81	0.421	1.81346e-70	Endo
Sepp1	7.72798e-68	0.745096	0.68	0.267	1.31948e-63	Endo
Arpc5	5.71307e-65	0.705784	0.891	0.695	9.75449e-61	Endo
Arpc3	2.32189e-64	0.698391	0.842	0.502	3.9644e-60	Endo
B2m	5.98306e-63	0.674586	0.757	0.365	1.02155e-58	Endo
Plagl1	6.04433e-63	0.688583	0.729	0.314	1.03201e-58	Endo
Snx3	6.29586e-61	0.627803	0.944	0.817	1.07496e-56	Endo
Arpc2	8.8091e-61	0.681205	0.923	0.707	1.50407e-56	Endo
Sh3glb1	9.49777e-56	0.63811	0.827	0.562	1.62165e-51	Endo
Bok	2.40568e-55	0.715544	0.634	0.298	4.10747e-51	Endo
Gnb2	2.26034e-54	0.611103	0.933	0.763	3.85931e-50	Endo
Ppp1r2	2.29166e-48	0.640995	0.891	0.681	3.91279e-44	Endo
Sat1	7.68987e-46	1.04819	0.542	0.219	1.31297e-41	Endo
Tax1bp3	2.56622e-44	0.603406	0.796	0.588	4.38156e-40	Endo
Serpinh1	1.28739e-43	0.676068	0.873	0.795	2.1981e-39	Endo
Asb4	5.8592e-42	0.605326	0.599	0.302	1.0004e-37	Endo
Apoe	3.33904e-39	0.701153	0.433	0.163	5.70108e-35	Endo
Actb	6.25964e-33	0.684789	1	1	1.06877e-28	Endo
Rap1b	2.1597e-32	0.665993	0.831	0.686	3.68748e-28	Endo
Tuba1a	3.03194e-29	0.644551	0.852	0.786	5.17673e-25	Endo
Lhx2	0	1.52297	0.721	0.013	0	HM
Tnnt1	0	1.39066	0.711	0.033	0	HM
Msc	0	1.21905	0.629	0.003	0	HM
Pgf	0	1.08241	0.604	0.025	0	HM
Vgll3	0	0.825018	0.523	0.019	0	HM
Lrrn1	0	0.656037	0.447	0.018	0	HM
Hlx	0	0.636489	0.35	0.006	0	HM
Barx2	2.2432e-223	0.687936	0.442	0.027	3.83003e-219	HM
Igfbp5	4.14745e-201	1.40191	0.868	0.135	7.08136e-197	HM
Pitx2	2.08569e-192	0.741279	0.548	0.049	3.56111e-188	HM
Parm1	1.00077e-173	0.804259	0.497	0.047	1.70871e-169	HM
Ntng1	3.31433e-156	1.12667	0.604	0.082	5.65888e-152	HM
Pdgfa	4.45616e-122	0.819951	0.665	0.109	7.60845e-118	HM
Celf2	6.95334e-111	0.722146	0.523	0.082	1.18721e-106	HM
Gm266	7.33527e-107	1.13552	0.701	0.183	1.25242e-102	HM
Shisa2	7.75077e-102	0.988606	0.777	0.211	1.32337e-97	HM
Ebf1	2.12578e-100	1.36533	0.888	0.345	3.62956e-96	HM
Tmsb4x	2.28307e-89	1.08476	1	0.971	3.89811e-85	HM
Nnat	1.67259e-87	1.40293	0.98	0.93	2.85577e-83	HM
Glipr2	5.3676e-82	0.928255	0.66	0.196	9.16464e-78	HM
Trp53i11	1.09469e-77	0.730191	0.528	0.116	1.86907e-73	HM
Phlda1	1.49632e-58	0.889147	0.69	0.278	2.55481e-54	HM
Tpm2	2.08819e-55	0.705176	0.609	0.208	3.56537e-51	HM
Tshz2	1.80381e-51	0.903969	0.69	0.275	3.07983e-47	HM
Socs2	3.66448e-50	0.747768	0.528	0.17	6.25674e-46	HM
Gpx3	1.31071e-47	0.785817	0.68	0.298	2.23791e-43	HM
Pfn2	2.18044e-46	0.855759	0.868	0.653	3.72288e-42	HM
Ppp1r14b	2.59615e-45	0.671879	0.97	0.919	4.43267e-41	HM
Hes6	2.64919e-37	0.714109	0.604	0.275	4.52322e-33	HM
Hacd1	3.2281e-36	0.695834	0.685	0.392	5.51165e-32	HM
Abracl	8.59835e-28	0.632911	0.843	0.751	1.46808e-23	HM
Xist	1.79973e-27	0.612218	0.868	0.849	3.07287e-23	HM
