# Supplementary material for: Hedgehog signaling patterns the oral-aboral axis of the mandibular arch
Source: eLife. 2019 Jan 14;8:e40315. doi: 10.7554/eLife.40315 (PMC6347453; doi:10.7554/eLife.40315)
Supplement: Supplementary file 2. — Column A list gene name. Column B list p value of differential expression. Column C lists average fold change of expression of the marker gene in NC1/2 cells over NC3 cells. Positive value in Column C indicates higher levels of expression in NC1/2 than in NC3. Column D lists percentage of cells in NC1/2 clusters expressing the gene. Column E list percentage of cells in NC3 cluster expressing the gene. Column F list Bonferroni corrected p value of differentiation expression. Genes whose expression pattern is shown in Figure 1—figure supplement 4 are highlighted in yellow. [file elife-40315-supp2.xlsx]

## Sheet: NC1n2vsNC3_diff_exp
	p_val	avg_logFC	pct.1	pct.2	p_val_adj
Malat1	5.03223e-292	2.85945	0.999	0.298	8.59203e-288
Sox11	1.31646e-213	1.01713	0.998	0.752	2.24772e-209
Xist	2.1751e-211	2.39651	0.88	0.207	3.71377e-207
Meg3	1.61328e-205	1.93479	0.864	0.076	2.75452e-201
Peg3	2.09583e-183	1.43771	0.885	0.161	3.57842e-179
Prdx1	7.79284e-180	-0.839074	0.97	0.994	1.33055e-175
Kcnq1ot1	1.56072e-173	1.06944	0.771	0.019	2.66478e-169
Srrm2	3.22319e-172	1.0211	0.937	0.24	5.50327e-168
Ankrd11	1.26316e-155	0.920712	0.81	0.083	2.15672e-151
Ppp1r14b	8.9855e-144	0.899083	0.949	0.424	1.53418e-139
Mest	3.76637e-142	0.67601	0.998	0.897	6.4307e-138
Rbm39	3.5526e-141	0.752812	0.988	0.605	6.0657e-137
Pnisr	5.19178e-135	0.82403	0.797	0.11	8.86444e-131
Ogt	5.10593e-131	0.808904	0.71	0.054	8.71787e-127
Scd2	6.41073e-128	0.835664	0.858	0.207	1.09457e-123
Pbx1	4.52343e-126	0.82168	0.838	0.178	7.7233e-122
Tia1	6.48584e-125	0.7726	0.761	0.099	1.10739e-120
Pbrm1	3.38477e-119	0.757089	0.795	0.147	5.77916e-115
Ccnt2	1.94693e-118	0.72751	0.665	0.041	3.32419e-114
P4hb	1.35561e-117	0.725813	0.715	0.083	2.31457e-113
Nedd4	8.39777e-115	0.733473	0.938	0.395	1.43383e-110
Tra2a	9.1281e-114	0.724867	0.841	0.205	1.55853e-109
Rsrp1	1.50934e-113	0.708986	0.786	0.138	2.57705e-109
Mtdh	2.11576e-111	0.747668	0.815	0.186	3.61245e-107
Chd4	6.72777e-109	0.709813	0.811	0.174	1.1487e-104
Rbm25	1.1198e-104	0.671134	0.855	0.24	1.91195e-100
Phip	5.09614e-104	0.66677	0.747	0.134	8.70114e-100
Mex3a	2.29762e-100	0.65274	0.709	0.11	3.92295e-96
Prrc2c	2.7218e-100	0.661399	0.772	0.159	4.6472e-96
Ttc3	5.4341e-99	0.668863	0.908	0.349	9.27818e-95
Pkn2	7.52003e-96	0.610272	0.671	0.091	1.28397e-91
Luzp1	2.45887e-94	0.626459	0.703	0.122	4.19827e-90
Grb10	1.31269e-93	0.664337	0.917	0.372	2.24128e-89
Nr2f1	2.27458e-90	0.857972	0.721	0.19	3.88361e-86
Meis2	3.81087e-90	0.755469	0.717	0.157	6.50669e-86
Twist1	5.81734e-90	0.689542	0.719	0.153	9.93253e-86
Enah	3.6342e-89	0.602383	0.756	0.174	6.20504e-85
Ubb	1.27768e-84	-0.648546	0.937	0.924	2.18151e-80
Zfhx3	1.28383e-82	0.650653	0.649	0.12	2.19201e-78
Sox4	1.14948e-81	0.65346	0.957	0.529	1.96262e-77
Tcf4	2.22321e-78	0.633643	0.658	0.138	3.79591e-74
Top2a	4.84087e-74	0.683509	0.773	0.298	8.2653e-70
Eno1	1.46431e-72	-0.600909	0.915	0.909	2.50016e-68
Foxp1	3.5e-72	0.619622	0.6	0.112	5.9759e-68
Hist1h2ap	1.46855e-65	0.658022	0.582	0.136	2.5074e-61
Runx1t1	1.91913e-63	0.619368	0.543	0.097	3.27672e-59
Mpped2	3.22958e-52	0.684614	0.499	0.112	5.51419e-48
Nr2f2	1.89774e-51	0.614278	0.603	0.188	3.24021e-47
Plagl1	1.6793e-34	0.601303	0.326	0.052	2.86724e-30
