# Supplementary material for: Hedgehog signaling patterns the oral-aboral axis of the mandibular arch
Source: eLife. 2019 Jan 14;8:e40315. doi: 10.7554/eLife.40315 (PMC6347453; doi:10.7554/eLife.40315)
Supplement: Supplementary file 3. — Genes that are shown in Figure 1B are highlighted in yellow color. Column A lists gene name. Column B lists p value of differential expression. Column C lists average fold change over all other subgroups. Column D list the percentage of cells in the corresponding subgroup expressing the marker gene. Column E list the percentage of cells in all other subgroups combined expressing the marker gene. Column F list the Bonferroni corrected p value of differential expression. Column G lists the subgroup number corresponding to Figure 1B. [file elife-40315-supp3.xlsx]

## Sheet: Fig S2 NConly_6cluster_markerli
gene	p_val	avg_logFC	pct.1	pct.2	p_val_adj	subgroup
Plagl1	0	1.02933	0.766	0.209	0	0
H19	0	0.833508	0.998	0.906	0	0
Meg3	0	0.786295	0.991	0.83	0	0
Meis2	0	0.754646	0.941	0.657	0	0
Foxf1	0	0.748872	0.549	0.079	0	0
Igf2	0	0.656227	0.895	0.526	0	0
Shisa2	0	0.586599	0.549	0.145	0	0
Gnas	0	0.557532	0.996	0.975	0	0
Peg3	2.99e-306	0.645479	0.971	0.862	4.82e-302	0
Cited1	3.76e-238	0.68663	0.78	0.461	6.06e-234	0
Dlk1	1.61e-237	0.618822	0.954	0.733	2.59e-233	0
Gsc	1.31e-233	0.640224	0.602	0.236	2.12e-229	0
Rps6ka3	1.23e-227	0.557227	0.73	0.414	1.99e-223	0
Gpr50	1.14e-216	0.458866	0.389	0.098	1.84e-212	0
Ndn	1.02e-195	0.539887	0.801	0.558	1.64e-191	0
Pdgfc	6.79e-188	0.470588	0.505	0.193	1.09e-183	0
Maf	3.71e-181	0.325654	0.179	0.016	5.98e-177	0
Runx1t1	9.2e-179	0.536559	0.78	0.479	1.48e-174	0
Ptch1	5.28e-166	0.461722	0.572	0.27	8.51e-162	0
Wbp5	6.16e-159	0.330473	0.996	0.993	9.92e-155	0
Mecom	4.65e-156	0.417271	0.638	0.343	7.49e-152	0
Magel2	1.1e-146	0.285566	0.328	0.097	1.77e-142	0
Satb2	1.27e-141	0.296076	0.352	0.116	2.05e-137	0
Maged2	5.23e-137	0.423402	0.573	0.302	8.42e-133	0
Tubb2b	4.58e-134	0.337848	0.292	0.084	7.38e-130	0
Cd24a	2.18e-133	0.305488	1	0.991	3.52e-129	0
Fndc3c1	2.52e-133	0.41325	0.777	0.551	4.05e-129	0
Hand2	2.38e-130	0.382501	0.739	0.448	3.84e-126	0
Phactr2	5.34e-129	0.389786	0.501	0.237	8.6e-125	0
6330403K07Rik	2.89e-112	0.413517	0.815	0.636	4.66e-108	0
Sat1	8.43e-110	0.402066	0.407	0.182	1.36e-105	0
Isl1	5.47e-105	0.307923	0.264	0.081	8.81e-101	0
Bcl11a	6.1e-104	0.416304	0.762	0.597	9.83e-100	0
H2afv	2.55e-101	0.260018	0.999	0.996	4.1e-97	0
Ngfrap1	1.06e-100	0.285159	0.996	0.993	1.71e-96	0
Col9a1	3.48e-99	0.441361	0.669	0.434	5.61e-95	0
Itm2a	3.78e-98	0.433327	0.593	0.384	6.09e-94	0
Foxf2	1.52e-97	0.265959	0.253	0.08	2.45e-93	0
Csrp2	1.54e-97	0.297171	0.96	0.899	2.48e-93	0
Sox4	5.88e-91	0.332202	0.977	0.951	9.47e-87	0
Ptn	2.94e-90	0.346925	0.947	0.814	4.74e-86	0
Chd3	1.72e-88	0.366505	0.692	0.489	2.77e-84	0
Grb10	2.39e-86	0.294635	0.956	0.907	3.86e-82	0
Foxp1	1.8e-84	0.356095	0.752	0.56	2.91e-80	0
Pmp22	9.15e-82	0.300428	0.276	0.109	1.47e-77	0
Epha4	2.02e-79	0.316145	0.501	0.303	3.26e-75	0
Rhoc	1.95e-74	0.31018	0.773	0.618	3.14e-70	0
Malat1	3.42e-69	0.294816	0.999	0.999	5.51e-65	0
Usp29	6.29e-68	0.276514	0.5	0.319	1.01e-63	0
Id2	6.06e-65	0.271041	0.902	0.764	9.76e-61	0
Tsc22d1	6.34e-65	0.256633	0.942	0.894	1.02e-60	0
Sema6a	3.76e-53	0.275348	0.375	0.221	6.05e-49	0
Vim	7.17e-53	0.251104	0.271	0.132	1.15e-48	0
Tmsb4x	2.07e-45	0.254108	0.985	0.969	3.33e-41	0
Hand1	0	1.42301	0.671	0.066	0	1
Msx1	0	1.25141	0.934	0.489	0	1
Mpped2	0	1.05314	0.866	0.434	0	1
Bambi	0	0.912287	0.871	0.404	0	1
Msx2	0	0.902377	0.784	0.213	0	1
Alx3	0	0.870307	0.622	0.053	0	1
Tshz2	0	0.815043	0.706	0.224	0	1
Id2	0	0.800675	0.985	0.759	0	1
Dkk1	0	0.734449	0.52	0.057	0	1
Alx1	0	0.608767	0.414	0.042	0	1
Gadd45g	0	0.606248	0.413	0.055	0	1
5033428I22Rik	0	0.527115	0.52	0.081	0	1
Rgs5	2.58e-267	0.497723	0.334	0.043	4.15e-263	1
Creb5	6.06e-267	0.564257	0.511	0.122	9.76e-263	1
Unc5b	2.41e-243	0.4131	0.444	0.098	3.88e-239	1
Syt6	2.08e-239	0.373874	0.285	0.033	3.34e-235	1
Gata3	2e-225	0.418283	0.418	0.089	3.23e-221	1
Hand2	1.01e-207	0.54196	0.832	0.452	1.63e-203	1
Gja1	8.23e-188	0.625512	0.856	0.597	1.33e-183	1
Plagl1	2.88e-181	0.553152	0.662	0.267	4.64e-177	1
Tgfb2	6.58e-172	0.351114	0.285	0.053	1.06e-167	1
Gap43	3.57e-170	0.593648	0.784	0.465	5.74e-166	1
Id1	3.46e-167	0.529349	0.92	0.66	5.57e-163	1
Id3	1.28e-160	0.452274	0.988	0.891	2.07e-156	1
Des	2.13e-160	0.332704	0.275	0.052	3.43e-156	1
Cox4i2	1.57e-158	0.370043	0.384	0.109	2.53e-154	1
Prrx2	2.36e-156	0.523698	0.925	0.748	3.81e-152	1
Tmsb4x	3.4e-149	0.529441	0.995	0.968	5.48e-145	1
Lix1	4.07e-145	0.573169	0.722	0.442	6.56e-141	1
Tbx3	3.08e-140	0.42636	0.592	0.266	4.96e-136	1
Igf2	1.34e-139	0.425316	0.879	0.555	2.16e-135	1
Sparc	2.85e-139	0.376722	0.345	0.096	4.59e-135	1
Isl1	3.27e-137	0.409065	0.323	0.084	5.27e-133	1
Bmp4	3.98e-127	0.267209	0.267	0.062	6.42e-123	1
H19	2.43e-116	0.383391	0.998	0.913	3.92e-112	1
Col1a1	1.34e-97	0.291003	0.275	0.083	2.16e-93	1
Maged2	2.43e-95	0.377249	0.59	0.318	3.92e-91	1
Unc5c	9.84e-91	0.290428	0.466	0.216	1.58e-86	1
Arhgap29	1.26e-90	0.305117	0.3	0.105	2.04e-86	1
Cald1	5.54e-90	0.359645	0.921	0.833	8.92e-86	1
Vim	9.29e-88	0.290807	0.343	0.129	1.5e-83	1
Ptn	2.31e-84	0.315193	0.959	0.821	3.72e-80	1
Nrp2	6.37e-83	0.277068	0.339	0.132	1.03e-78	1
Cdo1	1.96e-82	0.287326	0.381	0.163	3.15e-78	1
Asb4	3.64e-82	0.354719	0.539	0.289	5.86e-78	1
Ahnak	4.8e-80	0.256904	0.305	0.114	7.73e-76	1
Dkk2	4.12e-78	0.280446	0.284	0.101	6.64e-74	1
Lef1	1.2e-77	0.281057	0.459	0.235	1.93e-73	1
Igfbp5	1.32e-75	0.253602	0.187	0.049	2.12e-71	1
Card19	2.47e-75	0.306972	0.463	0.239	3.98e-71	1
Smad7	1.67e-71	0.259166	0.426	0.211	2.68e-67	1
Rhoc	1.02e-70	0.315189	0.816	0.622	1.65e-66	1
Igfbp4	3.3e-68	0.274544	0.973	0.906	5.31e-64	1
Mtch1	1.85e-67	0.314844	0.873	0.748	2.99e-63	1
Serpinh1	2.14e-64	0.29968	0.896	0.807	3.44e-60	1
Ramp2	1.4e-63	0.25243	0.332	0.15	2.25e-59	1
6330403K07Rik	7.32e-63	0.323011	0.822	0.647	1.18e-58	1
Tuba1a	1.2e-60	0.32773	0.879	0.79	1.93e-56	1
Cd24a	2.76e-60	0.301502	0.998	0.992	4.44e-56	1
Sema3a	5.46e-58	0.258369	0.438	0.238	8.8e-54	1
Dap	2.96e-54	0.322044	0.65	0.474	4.76e-50	1
Aes	4.47e-54	0.280692	0.778	0.601	7.21e-50	1
Snai2	1.44e-53	0.258622	0.442	0.257	2.33e-49	1
Nkd1	1.33e-51	0.271035	0.419	0.242	2.14e-47	1
Gabarap	2.56e-51	0.252737	0.956	0.914	4.13e-47	1
Eif3e	6.74e-49	0.253078	0.959	0.912	1.09e-44	1
Mfap4	1.41e-48	0.269146	0.747	0.593	2.26e-44	1
Fndc3c1	8.41e-47	0.258786	0.732	0.575	1.35e-42	1
Hes1	2.21e-45	0.259837	0.439	0.26	3.55e-41	1
Rbms3	6.38e-45	0.264679	0.27	0.132	1.03e-40	1
Limch1	2.47e-44	0.261217	0.614	0.444	3.99e-40	1
Dlk1	3.53e-41	0.261006	0.912	0.756	5.69e-37	1
Gpc6	2.72e-34	0.277676	0.571	0.432	4.38e-30	1
Frzb	1.85e-33	0.274166	0.561	0.434	2.98e-29	1
Ebf1	0	1.00738	0.84	0.281	0	2
Emx2	0	0.8573	0.516	0.038	0	2
Pantr1	0	0.853663	0.528	0.07	0	2
Pou3f3	0	0.567166	0.398	0.034	0	2
Smoc1	0	0.544185	0.494	0.077	0	2
E330013P04Rik	1.96e-271	0.282253	0.215	0.01	3.16e-267	2
Sox9	2.17e-249	0.625627	0.753	0.373	3.5e-245	2
Dnajc1	8.5e-231	0.583704	0.763	0.414	1.37e-226	2
Dlx1	1.36e-209	0.496208	0.667	0.306	2.2e-205	2
Tcf4	7.73e-204	0.54519	0.864	0.612	1.25e-199	2
Dlx2	6.55e-192	0.50678	0.776	0.435	1.05e-187	2
Pcdh19	4.97e-178	0.37691	0.414	0.129	8.01e-174	2
Tsc22d1	6.94e-171	0.490924	0.969	0.89	1.12e-166	2
Col23a1	3.81e-159	0.408816	0.56	0.25	6.13e-155	2
Dclk1	9.04e-158	0.466555	0.468	0.181	1.46e-153	2
Kctd12	7.05e-151	0.463222	0.514	0.221	1.14e-146	2
Cxcl12	4.16e-138	0.5318	0.612	0.32	6.71e-134	2
Nr2f1	5.03e-136	0.400522	0.927	0.675	8.1e-132	2
Homer2	8.91e-134	0.360173	0.479	0.21	1.43e-129	2
Col2a1	3e-130	0.410745	0.7	0.437	4.83e-126	2
Foxc1	5.62e-124	0.338252	0.333	0.106	9.06e-120	2
Foxd1	1.14e-118	0.424915	0.366	0.134	1.84e-114	2
Rab11fip2	7.98e-116	0.34688	0.474	0.222	1.29e-111	2
Shox2	1.39e-112	0.279002	0.244	0.064	2.23e-108	2
Net1	1.3e-105	0.368614	0.545	0.308	2.1e-101	2
Tmsb4x	6.69e-91	0.260515	0.996	0.967	1.08e-86	2
Col3a1	6.14e-75	0.291674	0.765	0.582	9.89e-71	2
Foxp1	1.19e-70	0.259307	0.787	0.559	1.91e-66	2
Bex4	2.1e-70	0.288273	0.744	0.561	3.38e-66	2
Eva1b	7.25e-70	0.297938	0.805	0.652	1.17e-65	2
Efna5	2.58e-64	0.289612	0.572	0.38	4.16e-60	2
Rap2c	2.4e-62	0.266503	0.62	0.442	3.86e-58	2
Hmcn1	3.26e-58	0.259867	0.524	0.344	5.26e-54	2
Gas1	6.6e-27	0.32458	0.724	0.66	1.06e-22	2
Dlx4os	2.71e-196	0.315375	0.276	0.043	4.36e-192	3
Gsc	4.23e-195	0.476347	0.644	0.247	6.82e-191	3
Tshz1	1.04e-185	0.485468	0.587	0.247	1.68e-181	3
Gas1	4.65e-167	0.55256	0.899	0.626	7.49e-163	3
Nr2f1	2.22e-145	0.455442	0.923	0.681	3.58e-141	3
Ptn	3.21e-128	0.430427	0.962	0.818	5.17e-124	3
Col9a1	1.17e-119	0.419882	0.733	0.434	1.89e-115	3
Dlx3	5.17e-119	0.271603	0.344	0.109	8.33e-115	3
Meis1	8.34e-90	0.299664	0.481	0.229	1.34e-85	3
Col25a1	2.86e-89	0.254998	0.305	0.11	4.61e-85	3
Zfhx3	1.52e-74	0.326194	0.796	0.619	2.45e-70	3
S100a11	9.54e-57	0.268974	0.699	0.51	1.54e-52	3
Cited1	1.12e-44	0.257673	0.684	0.497	1.81e-40	3
Pitx1	0	1.01103	0.826	0.278	0	4
Lhx8	0	0.86834	0.858	0.256	0	4
Crlf1	0	0.683301	0.773	0.196	0	4
Eif5a	0	0.390248	1	0.997	0	4
Hspe1	0	0.360516	1	0.998	0	4
Nhp2	4.49e-294	0.468742	0.997	0.892	7.24e-290	4
Mif	2.24e-289	0.301408	1	0.999	3.61e-285	4
Eif4ebp1	7.33e-281	0.532902	0.947	0.669	1.18e-276	4
Tbx2	9.36e-270	0.438936	0.659	0.23	1.51e-265	4
Ncl	1.55e-266	0.444114	0.997	0.952	2.5e-262	4
Cnbp	1.5e-240	0.366949	0.998	0.961	2.41e-236	4
Rps27l	2.89e-237	0.28777	0.999	0.997	4.65e-233	4
Lhx6	2.92e-235	0.256411	0.317	0.051	4.7e-231	4
Barx1	6.08e-228	0.591811	0.895	0.514	9.79e-224	4
Dctpp1	9.92e-226	0.362536	0.998	0.933	1.6e-221	4
Fabp5	1.53e-224	0.375142	0.998	0.947	2.46e-220	4
Dusp6	1.84e-223	0.365755	0.567	0.189	2.97e-219	4
Srm	7.42e-219	0.460288	0.888	0.567	1.2e-214	4
Nbl1	3.04e-216	0.450767	0.677	0.277	4.89e-212	4
Ccne1	9.16e-209	0.435523	0.777	0.382	1.48e-204	4
Tomm20	5.88e-208	0.298781	0.999	0.987	9.47e-204	4
Cycs	6.19e-207	0.316698	0.999	0.973	9.97e-203	4
Odc1	5.1e-203	0.462398	0.926	0.676	8.22e-199	4
Spry1	8.81e-192	0.269112	0.333	0.074	1.42e-187	4
Ran	2.15e-190	0.284027	1	0.991	3.47e-186	4
Lyar	1.08e-184	0.401547	0.957	0.776	1.74e-180	4
Cacybp	1.16e-183	0.398408	0.979	0.857	1.87e-179	4
Tomm5	1.03e-178	0.350999	0.984	0.882	1.66e-174	4
Prdx6	1.28e-176	0.352979	0.991	0.885	2.06e-172	4
Nhp2l1	3.89e-175	0.282241	0.998	0.978	6.27e-171	4
Tbx3	5.46e-175	0.343984	0.601	0.242	8.8e-171	4
Ldha	2.44e-172	0.424688	0.98	0.836	3.92e-168	4
Eif2s2	1.02e-168	0.346952	0.985	0.886	1.65e-164	4
Crabp1	5.76e-162	0.461873	0.961	0.82	9.28e-158	4
Mrpl12	1.28e-160	0.354315	0.972	0.839	2.07e-156	4
Minos1	1.94e-157	0.314059	0.999	0.943	3.13e-153	4
Prrx1	1.4e-156	0.389129	0.976	0.806	2.25e-152	4
Nme1	9.43e-149	0.251808	1	0.987	1.52e-144	4
Phb2	2.21e-148	0.312895	0.986	0.897	3.56e-144	4
Fkbp11	6.27e-147	0.314393	0.623	0.292	1.01e-142	4
Nop10	6.29e-145	0.298077	0.992	0.926	1.01e-140	4
Cdkn1c	3.15e-141	0.393672	0.92	0.665	5.07e-137	4
Anp32b	1.7e-139	0.289915	0.996	0.956	2.75e-135	4
Llph	9.23e-139	0.338012	0.937	0.746	1.49e-134	4
Eif5	1.32e-138	0.279279	0.995	0.961	2.12e-134	4
Mycn	2.7e-138	0.325949	0.711	0.378	4.34e-134	4
Txnl4a	3.35e-135	0.330681	0.958	0.839	5.4e-131	4
1500009L16Rik	1.53e-125	0.425553	0.8	0.553	2.47e-121	4
Tril	1.32e-120	0.280286	0.588	0.286	2.12e-116	4
E130012A19Rik	3.91e-118	0.307825	0.714	0.414	6.3e-114	4
Rsl1d1	9.33e-118	0.319676	0.878	0.65	1.5e-113	4
Gnl3	2.59e-117	0.306983	0.793	0.498	4.17e-113	4
Eif1a	2.08e-116	0.32136	0.838	0.572	3.35e-112	4
Nnat	4.07e-115	0.432591	0.985	0.947	6.56e-111	4
C1qbp	4.69e-112	0.308271	0.925	0.73	7.56e-108	4
Fkbp4	3.45e-110	0.274734	0.98	0.868	5.55e-106	4
Ppa1	4.4e-110	0.303052	0.842	0.575	7.09e-106	4
Ier2	2.87e-108	0.318265	0.854	0.59	4.63e-104	4
Bok	5.17e-108	0.275661	0.534	0.255	8.32e-104	4
Hspd1	8.13e-108	0.297344	0.934	0.763	1.31e-103	4
Ebna1bp2	8.85e-107	0.311105	0.853	0.603	1.43e-102	4
Ybx3	7.99e-106	0.267586	0.663	0.37	1.29e-101	4
Snrpa1	1.31e-105	0.294515	0.936	0.746	2.11e-101	4
Six1	2.43e-105	0.266218	0.541	0.263	3.92e-101	4
Zfos1	1.62e-104	0.288939	0.979	0.874	2.61e-100	4
Nudc	1.01e-101	0.291442	0.94	0.768	1.62e-97	4
Bola2	2.43e-101	0.259052	0.968	0.838	3.91e-97	4
Nop56	2.56e-101	0.288658	0.912	0.688	4.12e-97	4
Rangrf	3.37e-101	0.282386	0.821	0.55	5.43e-97	4
Pgam1	4.86e-101	0.28626	0.967	0.831	7.82e-97	4
Gar1	7.43e-99	0.275556	0.887	0.662	1.2e-94	4
Ddx21	8.65e-99	0.26559	0.721	0.436	1.39e-94	4
Rexo2	1.83e-98	0.278244	0.764	0.486	2.95e-94	4
Dcun1d5	1.23e-97	0.263673	0.961	0.83	1.98e-93	4
Ccnd2	4.14e-95	0.278771	0.964	0.804	6.67e-91	4
Smco4	5.42e-95	0.260149	0.729	0.441	8.73e-91	4
Twist1	3.8e-94	0.28826	0.884	0.678	6.12e-90	4
Hsp90aa1	6.38e-94	0.263647	0.995	0.953	1.03e-89	4
Aars	7.01e-94	0.275966	0.859	0.613	1.13e-89	4
Nolc1	5.22e-93	0.269902	0.754	0.479	8.41e-89	4
Apex1	6.51e-93	0.269696	0.969	0.826	1.05e-88	4
Chchd4	9.57e-93	0.279173	0.806	0.563	1.54e-88	4
Pa2g4	7.69e-90	0.271134	0.814	0.557	1.24e-85	4
Gm29666	1.98e-89	0.38442	0.467	0.228	3.19e-85	4
Manf	6.2e-89	0.275546	0.908	0.701	9.98e-85	4
Fam136a	3.09e-87	0.251813	0.945	0.808	4.99e-83	4
Ndufa8	9.29e-85	0.25843	0.895	0.704	1.5e-80	4
Prrx2	2.15e-84	0.315541	0.908	0.74	3.46e-80	4
Mpp6	2.71e-83	0.255579	0.811	0.57	4.36e-79	4
Dnajc2	5.5e-81	0.254966	0.87	0.663	8.86e-77	4
Rrs1	5.59e-81	0.250436	0.662	0.407	9e-77	4
Sssca1	3.72e-79	0.259389	0.812	0.578	5.99e-75	4
Amd1	2.34e-78	0.255458	0.789	0.541	3.77e-74	4
Tpi1	2.4e-76	0.284312	0.928	0.767	3.87e-72	4
Pbld2	6.18e-34	0.273151	0.264	0.143	9.95e-30	4
Actb	0	1.70587	1	1	0	5
Cbx3	0	1.36585	1	0.887	0	5
Notch2	2.9e-287	1.06092	0.753	0.249	4.68e-283	5
Kdelr2	3.66e-212	0.921022	0.895	0.583	5.9e-208	5
Set	9.64e-188	0.541494	0.999	0.993	1.55e-183	5
Hsf2	1.36e-181	0.729923	0.575	0.179	2.19e-177	5
Slc39a1	4.94e-177	0.712061	0.532	0.155	7.96e-173	5
Kdm6b	2.25e-176	0.82585	0.769	0.399	3.63e-172	5
Slc24a5	1.18e-167	0.853517	0.806	0.478	1.9e-163	5
Rbm15	1.96e-164	0.71789	0.627	0.244	3.16e-160	5
Amt	5.41e-130	0.544664	0.427	0.125	8.71e-126	5
Myef2	2.34e-128	0.705273	0.782	0.54	3.77e-124	5
Mcmbp	1.22e-117	0.683555	0.7	0.405	1.97e-113	5
Alkbh5	7.51e-115	0.695189	0.688	0.407	1.21e-110	5
Lrrc8a	4.43e-114	0.624803	0.648	0.339	7.14e-110	5
Paip1	3.14e-112	0.653473	0.653	0.361	5.05e-108	5
Gpc3	3.28e-94	0.651852	0.834	0.69	5.29e-90	5
Spry2	5.93e-93	0.506528	0.326	0.096	9.55e-89	5
Pfas	2.02e-85	0.58543	0.629	0.394	3.25e-81	5
Ric1	4.14e-85	0.558716	0.427	0.175	6.67e-81	5
St13	3.85e-84	0.45311	0.897	0.881	6.21e-80	5
Klhl9	3.49e-80	0.569791	0.635	0.401	5.63e-76	5
Ythdf2	2.75e-79	0.590428	0.743	0.6	4.43e-75	5
Marf1	2.41e-72	0.505904	0.488	0.242	3.88e-68	5
Abhd2	5.62e-72	0.338945	0.217	0.053	9.05e-68	5
Peg12	7.03e-72	0.506918	0.545	0.31	1.13e-67	5
Nr2f2	1.15e-70	0.796375	0.742	0.59	1.86e-66	5
Gatad1	4.97e-66	0.513456	0.738	0.629	8e-62	5
Dpysl2	7.94e-63	0.444406	0.814	0.771	1.28e-58	5
Gsk3b	4.39e-58	0.483161	0.761	0.651	7.08e-54	5
Rrn3	9.12e-58	0.427268	0.479	0.266	1.47e-53	5
Rap2b	9.61e-54	0.427176	0.412	0.208	1.55e-49	5
2018-09-10	1.82e-53	0.406225	0.309	0.128	2.93e-49	5
Otub1	4.63e-51	0.465691	0.569	0.398	7.46e-47	5
Birc6	2.61e-48	0.464271	0.562	0.389	4.2e-44	5
Yme1l1	4.33e-47	0.447536	0.536	0.362	6.97e-43	5
Sirt6	1.2e-45	0.403001	0.355	0.174	1.93e-41	5
Zscan26	1.47e-45	0.319922	0.314	0.137	2.37e-41	5
Idh1	6.72e-43	0.469418	0.504	0.337	1.08e-38	5
Pdcd4	1.32e-42	0.469937	0.469	0.294	2.13e-38	5
Kmt2d	6.28e-42	0.362705	0.377	0.199	1.01e-37	5
Cdv3	5.07e-41	0.327703	0.884	0.897	8.16e-37	5
Wapl	6.89e-40	0.427687	0.612	0.491	1.11e-35	5
Ptp4a2	7.24e-40	0.357393	0.843	0.837	1.17e-35	5
Pim1	1.44e-39	0.498946	0.462	0.298	2.33e-35	5
Dfna5	1.52e-37	0.427689	0.44	0.283	2.45e-33	5
Dctn4	5.07e-35	0.384133	0.406	0.245	8.18e-31	5
Hnrnpul1	1.44e-33	0.420298	0.638	0.552	2.32e-29	5
Igf2r	2.31e-30	0.32248	0.275	0.14	3.72e-26	5
Arglu1	5.61e-28	0.267515	0.853	0.875	9.03e-24	5
Sc5d	1.12e-27	0.292716	0.251	0.124	1.8e-23	5
Mtmr2	4.45e-23	0.345711	0.394	0.277	7.17e-19	5
Psmd11	9.81e-23	0.362031	0.591	0.534	1.58e-18	5
Cdk6	4.02e-22	0.330515	0.452	0.341	6.48e-18	5
Prrx1	1.26e-21	0.269688	0.849	0.84	2.03e-17	5
Barx1	6.63e-21	0.391432	0.687	0.583	1.07e-16	5
Pabpc4l	1.25e-19	0.307444	0.344	0.231	2.02e-15	5
Ints7	7.58e-18	0.305246	0.365	0.257	1.22e-13	5
Prrc2c	1.37e-17	0.29084	0.748	0.774	2.2e-13	5
Gm26523	2.46e-17	0.336944	0.419	0.325	3.97e-13	5
Hmgcr	5.82e-16	0.363441	0.435	0.352	9.37e-12	5
Klf13	8.25e-14	0.280946	0.41	0.338	1.33e-09	5
Tmf1	2.2e-13	0.262424	0.316	0.227	3.54e-09	5
Pdzd8	7.16e-13	0.2734	0.375	0.3	1.15e-08	5
4933434E20Rik	2.31e-11	0.264986	0.523	0.501	3.73e-07	5
2018-09-02	2.61e-10	0.263603	0.579	0.591	4.2e-06	5
Pitx1	5.29e-10	0.27003	0.47	0.382	8.52e-06	5
Whsc1l1	2.77e-09	0.251355	0.417	0.364	4.47e-05	5
Zmynd8	5.72e-09	0.257182	0.414	0.364	9.22e-05	5
