# Supplementary material for: Hedgehog signaling patterns the oral-aboral axis of the mandibular arch
Source: eLife. 2019 Jan 14;8:e40315. doi: 10.7554/eLife.40315 (PMC6347453; doi:10.7554/eLife.40315)
Supplement: Supplementary file 4. [file elife-40315-supp4.xlsx]

## Sheet: Sheet1
	ID	Name	p Value	Bonferroni corrected p value	Genes from Input	Genes in Annotation
1	GO:2000113	negative regulation of cellular macromolecule biosynthetic process	7.658e-11	1.505e-07	20	1452
2	GO:0006357	regulation of transcription by RNA polymerase II	1.93e-10	3.792e-07	22	1916
3	GO:0010558	negative regulation of macromolecule biosynthetic process	2.196e-10	4.315e-07	20	1540
4	GO:0031327	negative regulation of cellular biosynthetic process	4.579e-10	8.997e-07	20	1605
5	GO:0045944	positive regulation of transcription by RNA polymerase II	5.35e-10	1.051e-06	17	1094
6	GO:0045892	negative regulation of transcription, DNA-templated	5.504e-10	1.081e-06	18	1261
7	GO:0009890	negative regulation of biosynthetic process	6.354e-10	1.249e-06	20	1635
8	GO:1903507	negative regulation of nucleic acid-templated transcription	9.33e-10	1.833e-06	18	1303
9	GO:0045596	negative regulation of cell differentiation	9.557e-10	1.878e-06	14	694
10	GO:1902679	negative regulation of RNA biosynthetic process	1.121e-09	2.203e-06	18	1318
11	GO:0045595	regulation of cell differentiation	1.25e-09	2.455e-06	20	1699
12	GO:0051253	negative regulation of RNA metabolic process	1.987e-09	3.905e-06	18	1366
13	GO:0051093	negative regulation of developmental process	3.541e-09	6.957e-06	15	914
14	GO:0045935	positive regulation of nucleobase-containing compound metabolic process	4.654e-09	9.145e-06	20	1832
15	GO:0001501	skeletal system development	5.26e-09	1.034e-05	12	530
16	GO:0009887	animal organ morphogenesis	6.818e-09	1.34e-05	16	1121
17	GO:0045934	negative regulation of nucleobase-containing compound metabolic process	9.517e-09	1.87e-05	18	1508
18	GO:0031328	positive regulation of cellular biosynthetic process	1.055e-08	2.074e-05	20	1921
19	GO:1903508	positive regulation of nucleic acid-templated transcription	1.17e-08	2.3e-05	18	1528
20	GO:0045893	positive regulation of transcription, DNA-templated	1.17e-08	2.3e-05	18	1528
21	GO:0051173	positive regulation of nitrogen compound metabolic process	1.294e-08	2.543e-05	20	1944
22	GO:1902680	positive regulation of RNA biosynthetic process	1.406e-08	2.762e-05	18	1546
23	GO:0009891	positive regulation of biosynthetic process	1.476e-08	2.901e-05	20	1959
24	GO:0010557	positive regulation of macromolecule biosynthetic process	1.898e-08	3.73e-05	19	1777
25	GO:0051254	positive regulation of RNA metabolic process	2.243e-08	4.408e-05	18	1593
26	GO:0010629	negative regulation of gene expression	3.114e-08	6.118e-05	18	1627
27	GO:0051172	negative regulation of nitrogen compound metabolic process	3.522e-08	6.921e-05	18	1640
28	GO:0010628	positive regulation of gene expression	5.162e-08	0.0001014	19	1890
29	GO:0060429	epithelium development	5.273e-08	0.0001036	16	1296
30	GO:0035295	tube development	9.069e-08	0.0001782	12	686
31	GO:0007417	central nervous system development	1.003e-07	0.0001972	14	1002
32	GO:0010721	negative regulation of cell development	2.11e-07	0.0004147	9	354
33	GO:0042127	regulation of cell proliferation	2.81e-07	0.0005521	17	1666
34	GO:0009790	embryo development	4.612e-07	0.0009062	14	1135
35	GO:0050768	negative regulation of neurogenesis	5.111e-07	0.001004	8	285
36	GO:0001503	ossification	6.396e-07	0.001257	9	404
37	GO:0043009	chordate embryonic development	8.722e-07	0.001714	11	691
38	GO:0051961	negative regulation of nervous system development	9.403e-07	0.001848	8	309
39	GO:0009792	embryo development ending in birth or egg hatching	9.903e-07	0.001946	11	700
40	GO:0001649	osteoblast differentiation	1.345e-06	0.002643	7	223
41	GO:0045665	negative regulation of neuron differentiation	1.514e-06	0.002976	7	227
42	GO:0048729	tissue morphogenesis	2.264e-06	0.00445	11	762
43	GO:0016477	cell migration	2.337e-06	0.004592	14	1300
44	GO:0048568	embryonic organ development	2.612e-06	0.005133	9	479
45	GO:0051241	negative regulation of multicellular organismal process	2.778e-06	0.005459	13	1127
46	GO:0031016	pancreas development	3.433e-06	0.006746	5	92
47	GO:0048598	embryonic morphogenesis	3.923e-06	0.007709	10	648
48	GO:0045668	negative regulation of osteoblast differentiation	4.488e-06	0.00882	4	44
49	GO:0048870	cell motility	6.996e-06	0.01375	14	1428
50	GO:0051674	localization of cell	6.996e-06	0.01375	14	1428
