# Supplementary material for: Hedgehog signaling patterns the oral-aboral axis of the mandibular arch
Source: eLife. 2019 Jan 14;8:e40315. doi: 10.7554/eLife.40315 (PMC6347453; doi:10.7554/eLife.40315)
Supplement: Supplementary file 5. — GO analysis was performed using Toppgene (https://toppgene.cchmc.org/enrichment.jsp). [file elife-40315-supp5.xlsx]

## Sheet: Sheet1
	ID	Name	p Value	Bonferroni Corrected p Value	Genes from Input	Genes in Annotation
1	GO:0009887	animal organ morphogenesis	5.472e-21	1.687e-17	32	1121
2	GO:0048762	mesenchymal cell differentiation	8.082e-19	2.493e-15	17	200
3	GO:0060485	mesenchyme development	3.587e-18	1.106e-14	18	264
4	GO:0048729	tissue morphogenesis	2.008e-16	6.192e-13	24	762
5	GO:0014031	mesenchymal cell development	2.478e-16	7.641e-13	15	186
6	GO:0048864	stem cell development	3.997e-16	1.233e-12	15	192
7	GO:0048863	stem cell differentiation	9.079e-16	2.8e-12	17	303
8	GO:0051093	negative regulation of developmental process	1.063e-15	3.278e-12	25	914
9	GO:0007507	heart development	2.315e-15	7.14e-12	21	593
10	GO:0072358	cardiovascular system development	3.075e-15	9.484e-12	26	1058
11	GO:0072359	circulatory system development	3.075e-15	9.484e-12	26	1058
12	GO:0000904	cell morphogenesis involved in differentiation	1.982e-14	6.114e-11	23	840
13	GO:0003007	heart morphogenesis	2.288e-14	7.056e-11	15	252
14	GO:0045596	negative regulation of cell differentiation	5.108e-14	1.575e-10	21	694
15	GO:0001501	skeletal system development	5.127e-14	1.581e-10	19	530
16	GO:0048732	gland development	2.837e-13	8.75e-10	18	504
17	GO:0060429	epithelium development	3.583e-13	1.105e-09	26	1296
18	GO:0040011	locomotion	9.365e-13	2.888e-09	29	1735
19	GO:0061448	connective tissue development	9.896e-13	3.052e-09	14	266
20	GO:0006928	movement of cell or subcellular component	1.074e-12	3.313e-09	30	1882
21	GO:0022603	regulation of anatomical structure morphogenesis	1.117e-12	3.445e-09	24	1128
22	GO:0051098	regulation of binding	1.268e-12	3.911e-09	15	332
23	GO:0009790	embryo development	1.275e-12	3.933e-09	24	1135
24	GO:0001503	ossification	1.525e-12	4.704e-09	16	404
25	GO:0001568	blood vessel development	1.962e-12	6.05e-09	19	651
26	GO:0016477	cell migration	3.038e-12	9.369e-09	25	1300
27	GO:0048870	cell motility	3.31e-12	1.021e-08	26	1428
28	GO:0051674	localization of cell	3.31e-12	1.021e-08	26	1428
29	GO:0045595	regulation of cell differentiation	3.884e-12	1.198e-08	28	1699
30	GO:0001944	vasculature development	3.89e-12	1.2e-08	19	677
31	GO:0035113	embryonic appendage morphogenesis	5.448e-12	1.68e-08	11	143
32	GO:0030326	embryonic limb morphogenesis	5.448e-12	1.68e-08	11	143
33	GO:0000902	cell morphogenesis	5.626e-12	1.735e-08	25	1337
34	GO:0003279	cardiac septum development	6.276e-12	1.936e-08	10	105
35	GO:0002009	morphogenesis of an epithelium	6.787e-12	2.093e-08	18	609
36	GO:0051216	cartilage development	8.727e-12	2.691e-08	12	197
37	GO:0051101	regulation of DNA binding	9.167e-12	2.827e-08	10	109
38	GO:0051100	negative regulation of binding	9.201e-12	2.838e-08	11	150
39	GO:0048514	blood vessel morphogenesis	1.473e-11	4.542e-08	17	551
40	GO:0043392	negative regulation of DNA binding	1.477e-11	4.555e-08	8	51
41	GO:0048562	embryonic organ morphogenesis	1.536e-11	4.736e-08	14	326
42	GO:0001837	epithelial to mesenchymal transition	1.873e-11	5.777e-08	10	117
43	GO:0048568	embryonic organ development	1.98e-11	6.106e-08	16	479
44	GO:0032989	cellular component morphogenesis	2.433e-11	7.504e-08	25	1430
45	GO:0014033	neural crest cell differentiation	2.588e-11	7.983e-08	9	84
46	GO:0003206	cardiac chamber morphogenesis	2.626e-11	8.099e-08	10	121
47	GO:0035108	limb morphogenesis	2.966e-11	9.146e-08	11	167
48	GO:0035107	appendage morphogenesis	2.966e-11	9.146e-08	11	167
49	GO:0007389	pattern specification process	3.23e-11	9.96e-08	16	495
50	GO:0001649	osteoblast differentiation	3.731e-11	1.151e-07	12	223
51	GO:0060411	cardiac septum morphogenesis	3.765e-11	1.161e-07	8	57
52	GO:0003205	cardiac chamber development	4.084e-11	1.259e-07	11	172
53	GO:2000026	regulation of multicellular organismal development	5.162e-11	1.592e-07	28	1893
54	GO:0043009	chordate embryonic development	5.437e-11	1.677e-07	18	691
55	GO:0009792	embryo development ending in birth or egg hatching	6.715e-11	2.071e-07	18	700
56	GO:0060173	limb development	1.129e-10	3.482e-07	11	189
57	GO:0048736	appendage development	1.129e-10	3.482e-07	11	189
58	GO:2000677	regulation of transcription regulatory region DNA binding	1.316e-10	4.059e-07	7	40
59	GO:0071363	cellular response to growth factor stimulus	1.635e-10	5.042e-07	17	643
60	GO:0048598	embryonic morphogenesis	1.843e-10	5.682e-07	17	648
61	GO:0061061	muscle structure development	2.279e-10	7.028e-07	17	657
62	GO:2000027	regulation of animal organ morphogenesis	3.128e-10	9.648e-07	12	268
63	GO:0070848	response to growth factor	3.151e-10	9.718e-07	17	671
64	GO:0014032	neural crest cell development	4.061e-10	1.252e-06	8	76
65	GO:0006915	apoptotic process	4.332e-10	1.336e-06	27	1923
66	GO:0035295	tube development	4.422e-10	1.364e-06	17	686
67	GO:0051241	negative regulation of multicellular organismal process	4.875e-10	1.504e-06	21	1127
68	GO:0012501	programmed cell death	6.059e-10	1.869e-06	27	1952
69	GO:0045667	regulation of osteoblast differentiation	8.244e-10	2.542e-06	9	123
70	GO:0048646	anatomical structure formation involved in morphogenesis	1.016e-09	3.135e-06	22	1299
71	GO:0003231	cardiac ventricle development	1.097e-09	3.384e-06	9	127
72	GO:0042476	odontogenesis	1.261e-09	3.89e-06	9	129
73	GO:0051094	positive regulation of developmental process	1.432e-09	4.417e-06	22	1323
74	GO:0060070	canonical Wnt signaling pathway	1.528e-09	4.712e-06	12	308
75	GO:2000826	regulation of heart morphogenesis	1.549e-09	4.777e-06	6	31
76	GO:0045597	positive regulation of cell differentiation	1.65e-09	5.089e-06	19	966
77	GO:0060828	regulation of canonical Wnt signaling pathway	1.708e-09	5.267e-06	11	244
78	GO:0050673	epithelial cell proliferation	2.031e-09	6.262e-06	13	391
79	GO:0042981	regulation of apoptotic process	3.297e-09	1.017e-05	23	1519
80	GO:0043067	regulation of programmed cell death	4.082e-09	1.259e-05	23	1536
81	GO:0030278	regulation of ossification	4.908e-09	1.514e-05	10	206
82	GO:0000122	negative regulation of transcription by RNA polymerase II	5.059e-09	1.56e-05	17	806
83	GO:0003215	cardiac right ventricle morphogenesis	5.352e-09	1.65e-05	5	18
84	GO:0030879	mammary gland development	5.39e-09	1.662e-05	9	152
85	GO:0003197	endocardial cushion development	5.689e-09	1.755e-05	6	38
86	GO:0001667	ameboidal-type cell migration	5.846e-09	1.803e-05	12	347
87	GO:0003151	outflow tract morphogenesis	6.989e-09	2.156e-05	7	69
88	GO:2000678	negative regulation of transcription regulatory region DNA binding	7.242e-09	2.233e-05	5	19
89	GO:2000113	negative regulation of cellular macromolecule biosynthetic process	8.019e-09	2.473e-05	22	1452
90	GO:0051240	positive regulation of multicellular organismal process	1.001e-08	3.086e-05	23	1610
91	GO:0071773	cellular response to BMP stimulus	1.05e-08	3.237e-05	9	164
92	GO:0071772	response to BMP	1.05e-08	3.237e-05	9	164
93	GO:0090090	negative regulation of canonical Wnt signaling pathway	1.107e-08	3.413e-05	9	165
94	GO:0003002	regionalization	1.195e-08	3.687e-05	12	370
95	GO:0010629	negative regulation of gene expression	1.221e-08	3.764e-05	23	1627
96	GO:0030857	negative regulation of epithelial cell differentiation	1.238e-08	3.818e-05	6	43
97	GO:0010941	regulation of cell death	1.591e-08	4.906e-05	23	1650
98	GO:0048585	negative regulation of response to stimulus	1.803e-08	5.56e-05	22	1518
99	GO:0042127	regulation of cell proliferation	1.907e-08	5.882e-05	23	1666
100	GO:0072132	mesenchyme morphogenesis	2.155e-08	6.646e-05	6	47
