# Supplementary material for: Hedgehog signaling patterns the oral-aboral axis of the mandibular arch
Source: eLife. 2019 Jan 14;8:e40315. doi: 10.7554/eLife.40315 (PMC6347453; doi:10.7554/eLife.40315)
Supplement: Supplementary file 6. [file elife-40315-supp6.xlsx]

## Sheet: state 3
	ID	Name	p Value	Bonferroni corrected p Value	Genes from Input	Genes in Annotation
1	GO:0001649	osteoblast differentiation	2.421e-16	8.486e-13	19	223
2	GO:0001501	skeletal system development	3.593e-16	1.259e-12	26	530
3	GO:0045595	regulation of cell differentiation	5.708e-16	2.001e-12	43	1699
4	GO:0009887	animal organ morphogenesis	1.392e-15	4.878e-12	35	1121
5	GO:0035295	tube development	2.392e-15	8.384e-12	28	686
6	GO:0045596	negative regulation of cell differentiation	3.203e-15	1.123e-11	28	694
7	GO:0045935	positive regulation of nucleobase-containing compound metabolic process	8.469e-15	2.969e-11	43	1832
8	GO:0031328	positive regulation of cellular biosynthetic process	8.709e-15	3.052e-11	44	1921
9	GO:0051093	negative regulation of developmental process	9.288e-15	3.255e-11	31	914
10	GO:0001503	ossification	1.066e-14	3.738e-11	22	404
11	GO:0051173	positive regulation of nitrogen compound metabolic process	1.338e-14	4.688e-11	44	1944
12	GO:0009891	positive regulation of biosynthetic process	1.763e-14	6.181e-11	44	1959
13	GO:0048568	embryonic organ development	3.591e-14	1.259e-10	23	479
14	GO:1903508	positive regulation of nucleic acid-templated transcription	9e-14	3.154e-10	38	1528
15	GO:0045893	positive regulation of transcription, DNA-templated	9e-14	3.154e-10	38	1528
16	GO:1902680	positive regulation of RNA biosynthetic process	1.3e-13	4.557e-10	38	1546
17	GO:0051101	regulation of DNA binding	2.117e-13	7.419e-10	13	109
18	GO:0051254	positive regulation of RNA metabolic process	3.313e-13	1.161e-09	38	1593
19	GO:0010557	positive regulation of macromolecule biosynthetic process	4.13e-13	1.448e-09	40	1777
20	GO:0009790	embryo development	5.043e-13	1.768e-09	32	1135
21	GO:0010628	positive regulation of gene expression	6.325e-13	2.217e-09	41	1890
22	GO:0006357	regulation of transcription by RNA polymerase II	9.905e-13	3.472e-09	41	1916
23	GO:0045667	regulation of osteoblast differentiation	1.032e-12	3.617e-09	13	123
24	GO:0045892	negative regulation of transcription, DNA-templated	1.552e-12	5.439e-09	33	1261
25	GO:0000904	cell morphogenesis involved in differentiation	2.417e-12	8.472e-09	27	840
26	GO:2000677	regulation of transcription regulatory region DNA binding	3.025e-12	1.06e-08	9	40
27	GO:0035108	limb morphogenesis	3.284e-12	1.151e-08	14	167
28	GO:0035107	appendage morphogenesis	3.284e-12	1.151e-08	14	167
29	GO:1903507	negative regulation of nucleic acid-templated transcription	3.794e-12	1.33e-08	33	1303
30	GO:0007417	central nervous system development	4.223e-12	1.48e-08	29	1002
31	GO:1902679	negative regulation of RNA biosynthetic process	5.176e-12	1.814e-08	33	1318
32	GO:0007167	enzyme linked receptor protein signaling pathway	5.929e-12	2.078e-08	29	1016
33	GO:0045944	positive regulation of transcription by RNA polymerase II	6.446e-12	2.259e-08	30	1094
34	GO:0043009	chordate embryonic development	9.817e-12	3.441e-08	24	691
35	GO:0001655	urogenital system development	1.156e-11	4.05e-08	18	355
36	GO:0048729	tissue morphogenesis	1.164e-11	4.08e-08	25	762
37	GO:0060485	mesenchyme development	1.234e-11	4.325e-08	16	264
38	GO:0009792	embryo development ending in birth or egg hatching	1.286e-11	4.509e-08	24	700
39	GO:0051253	negative regulation of RNA metabolic process	1.358e-11	4.759e-08	33	1366
40	GO:2000113	negative regulation of cellular macromolecule biosynthetic process	1.432e-11	5.02e-08	34	1452
41	GO:0010629	negative regulation of gene expression	1.52e-11	5.326e-08	36	1627
42	GO:0060429	epithelium development	1.712e-11	6e-08	32	1296
43	GO:0035239	tube morphogenesis	1.731e-11	6.068e-08	19	415
44	GO:0060173	limb development	1.767e-11	6.193e-08	14	189
45	GO:0048736	appendage development	1.767e-11	6.193e-08	14	189
46	GO:0048598	embryonic morphogenesis	1.832e-11	6.42e-08	23	648
47	GO:0007507	heart development	2.279e-11	7.988e-08	22	593
48	GO:0060562	epithelial tube morphogenesis	2.618e-11	9.176e-08	18	373
49	GO:0048562	embryonic organ morphogenesis	2.915e-11	1.022e-07	17	326
50	GO:0043392	negative regulation of DNA binding	3.174e-11	1.113e-07	9	51
