# Supplementary material for: Hedgehog signaling patterns the oral-aboral axis of the mandibular arch
Source: eLife. 2019 Jan 14;8:e40315. doi: 10.7554/eLife.40315 (PMC6347453; doi:10.7554/eLife.40315)
Supplement: Supplementary file 7. [file elife-40315-supp7.xlsx]

## Sheet: state 4
	ID	Name	p Value	Bonferroni corrected p value	Genes from Input	Genes in Annotation
1	GO:0009887	animal organ morphogenesis	6.347e-08	0.0001387	19	1121
2	GO:0003002	regionalization	2.578e-07	0.0005633	11	370
3	GO:0048699	generation of neurons	3.833e-07	0.0008375	21	1528
4	GO:0007389	pattern specification process	6.218e-07	0.001359	12	495
5	GO:0007423	sensory organ development	6.399e-07	0.001398	13	594
6	GO:0000904	cell morphogenesis involved in differentiation	1.041e-06	0.002275	15	840
7	GO:0022008	neurogenesis	1.087e-06	0.002374	21	1628
8	GO:0045165	cell fate commitment	1.524e-06	0.003329	9	274
9	GO:0030182	neuron differentiation	1.881e-06	0.004111	19	1398
10	GO:0070848	response to growth factor	2.484e-06	0.005428	13	671
11	GO:0048568	embryonic organ development	3.226e-06	0.007049	11	479
12	GO:0050673	epithelial cell proliferation	3.649e-06	0.007974	10	391
13	GO:0060351	cartilage development involved in endochondral bone morphogenesis	5.339e-06	0.01166	4	29
14	GO:0048562	embryonic organ morphogenesis	6.294e-06	0.01375	9	326
15	GO:0007417	central nervous system development	9.017e-06	0.0197	15	1002
16	GO:0009790	embryo development	9.185e-06	0.02007	16	1135
17	GO:0071363	cellular response to growth factor stimulus	9.249e-06	0.02021	12	643
18	GO:0048598	embryonic morphogenesis	9.997e-06	0.02184	12	648
19	GO:0030198	extracellular matrix organization	1.218e-05	0.02662	9	354
20	GO:0043062	extracellular structure organization	1.246e-05	0.02723	9	355
